# Supplementary material for: Two decades of climate driving the dynamics of functional and taxonomic diversity of a tropical small mammal community in western Mexico
Source: PLOS journal article supplement (doi:10.1371/journal.pone.0189104), 2017-12-11

**S8 Fig: Temporal dynamics for the observed dFDw (dots and lines) and 95% confidence interval predicted by the selected models (gray area).**

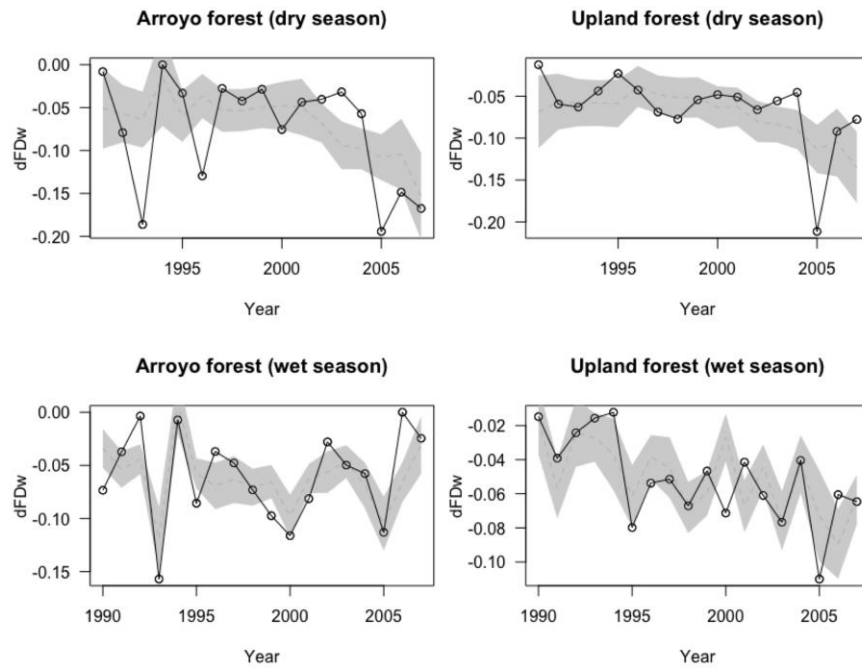

Supplement: S8 (10.1371/journal.pone.0189104.s008) [file journal.pone.0189104.s008]
